# Supplementary material for: An efficient oxygen evolution reaction catalyst using Ni–Co layered double hydroxide anchored on reduced graphene oxide
Source: Royal Society of Chemistry journal article supplement (doi:10.1039/d3ya00192j), 2023-01-01
Supplement: d3ya00192j1.pdf [file d3ya00192j1.pdf]

Supporting Information

**Efficient oxygen evolution reaction catalyst using Ni-Co layered double hydroxide anchored on reduced graphene oxide**

Sora Wakamatsu,<sup>a</sup> Md. Saidul Islam,<sup>a,b</sup> Yuta Shudo,<sup>c</sup> Masahiro Fukuda,<sup>a</sup> Ryuta Tagawa,<sup>a</sup> Nonoka Goto,<sup>a</sup> Michio Koinuma,<sup>b</sup> Yoshihiro Sekine<sup>a,d</sup> and Shinya Hayami<sup>\*a,b,e</sup>

<sup>a</sup> Department of Chemistry, Graduate School of Science and Technology, Kumamoto University, 2-39-1 Kurokami, Chuo-ku, Kumamoto 860-8555, (Japan).

<sup>b</sup> Institute of Industrial Nanomaterials (IINa), Kumamoto University, 2-39-1 Kurokami, Chuo-ku, Kumamoto 860-8555, (Japan).

<sup>c</sup> National Institute of Advanced Industrial Science and Technology (AIST), Japan.

<sup>d</sup> Priority Organization for Innovation and Excellence, Kumamoto University, 2-39-1 Kurokami, Chuo-ku, Kumamoto 860-8555 (Japan).

<sup>e</sup> International Research Center for Agricultural and Environmental Biology (IRCAEB)2-39-1 Kurokami, Chuo-ku, Kumamoto 860-8555, (Japan).

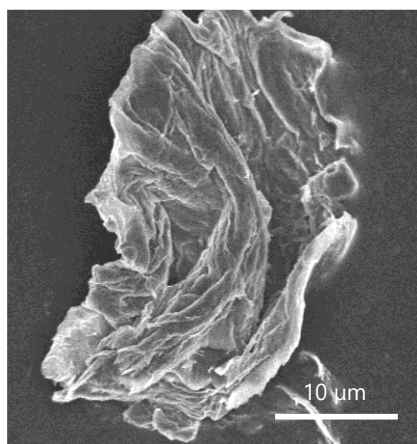

Figure S1: SEM image of rGO.

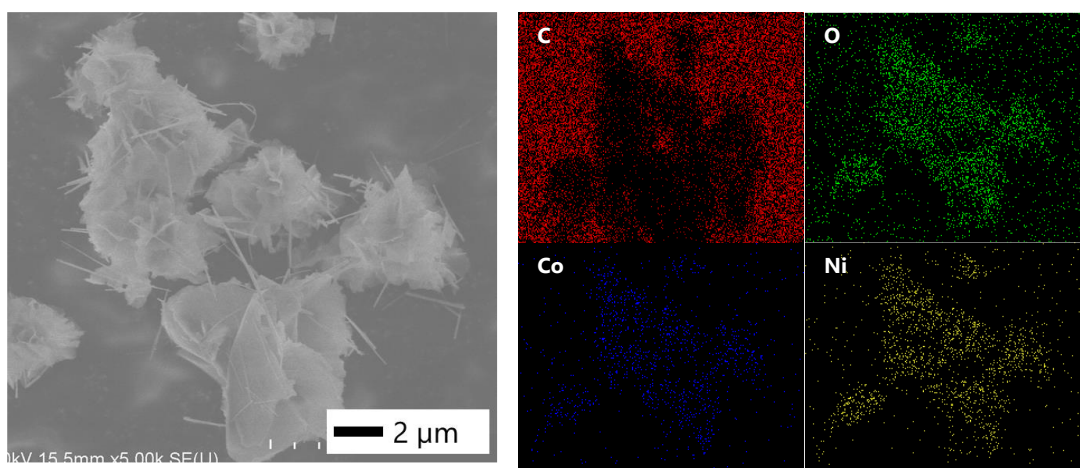

Figure S2: SEM image and corresponding EDX mapping of NiCo-LDH.

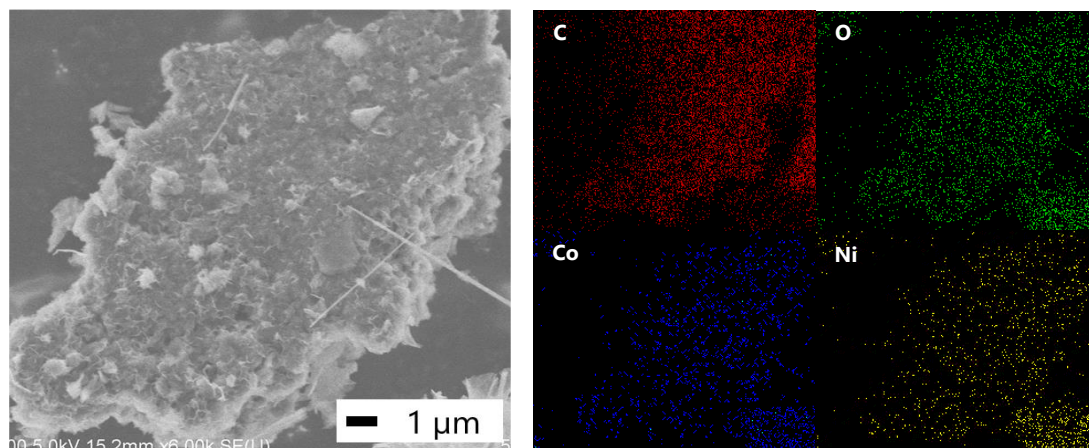

Figure S3: SEM image and corresponding EDX mapping of NiCo-LDH@rGO.

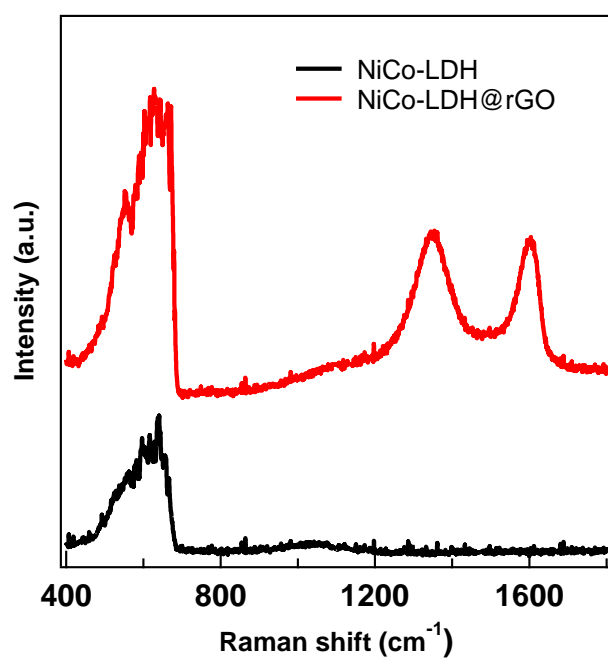

Figure S4: Raman spectrum of NiCo-LDH, and NiCo-LDH@rGO.

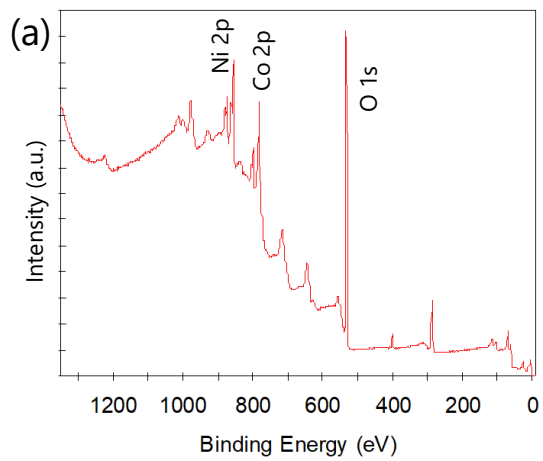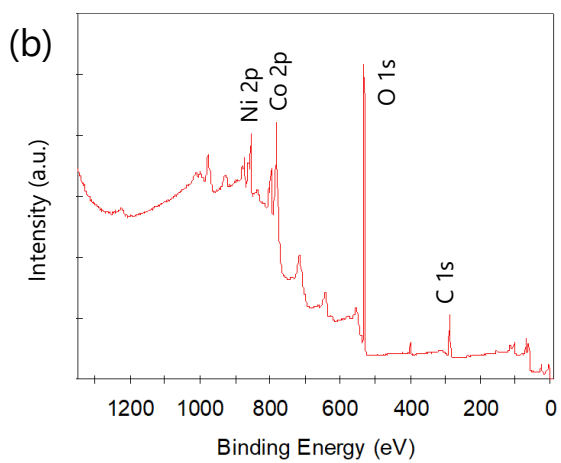

Figure S5: XPS survey spectrum of a) NiCo-LDH and b) NiCo-LDH@rGO.

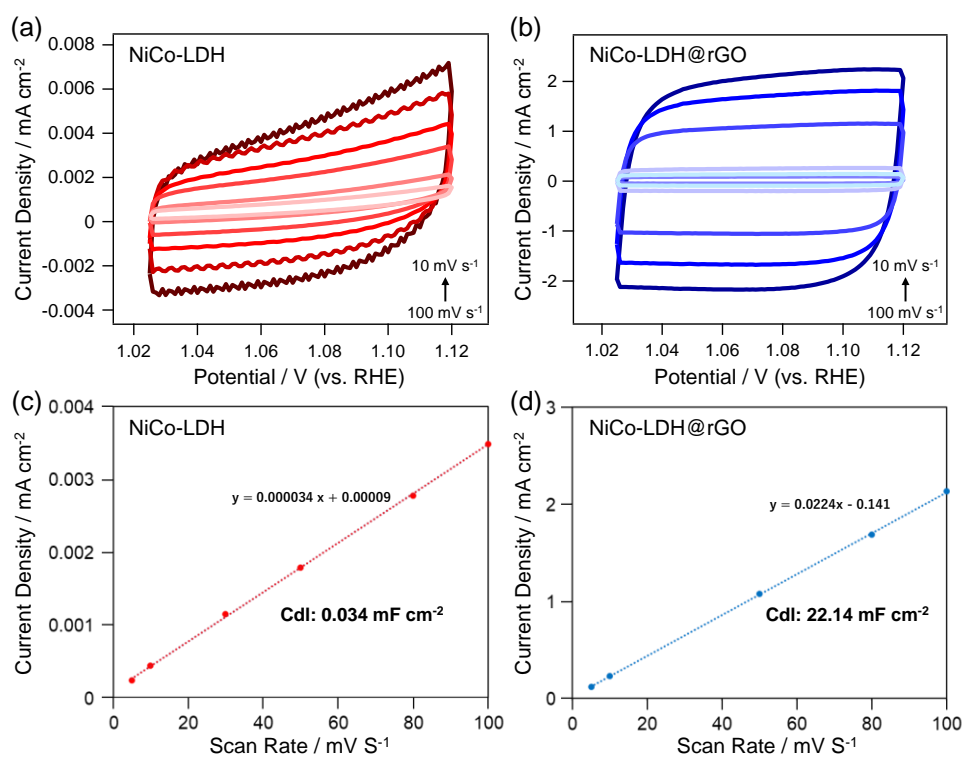

Figure S6: ECSA calculation for NiCo-LDH (a,c) and NiCo-LDH@rGO (b,d). The  $C_{dl}$  was calculated with the formula,  $C_{dl} = j/r$ , where  $j$  is the current density and  $r$  is the scan rate. The corresponding  $C_{dl}$ s were calculated to be 0.034 and 22.4  $\text{mF cm}^{-2}$  from the slope of the linear fit, respectively. ECSA can be calculated as:  $\text{ECSA} = C_{dl}/C_s$ , where  $C_s$  is the capacitance of an atomically smooth planar electrocatalyst surface per unit area under identical conditions. The general value of  $C_s$  ranges from 20-60  $\mu\text{F cm}^{-2}$ . In the following calculations of ECSA, 60  $\mu\text{F cm}^{-2}$  is used as  $C_s$ .

$$\text{ECSA}_{\text{NiCo-LDH}} = 0.034 \text{ mF cm}^{-2} / 60 \mu\text{F cm}^{-2} = 0.57$$

$$\text{ECSA}_{\text{NiCo-LDH@rGO}} = 22.4 \text{ mF cm}^{-2} / 60 \mu\text{F cm}^{-2} = 373$$
